# Supplementary material for: Smoking, Alcohol Intake and Torque Teno Virus in Stable Kidney Transplant Recipients
Source: MDPI journal article supplement (doi:10.3390/v15122387), 2023-12-06
Supplement: s1 [file s1]

### Supplementary Materials:

Table S1 Univariable and multivariable logistic regression analyses results, showing the odds ratios for having a detectable TTV load.

| Variable                                                     | Univariable<br>OR [95% CI] | <i>p</i> -Value | Multivariable<br>OR [95% CI] | <i>p</i> -Value |
|--------------------------------------------------------------|----------------------------|-----------------|------------------------------|-----------------|
| Female sex                                                   | 0.67 [0.45 – 1.01]         | 0.050           | 0.66 [0.43 – 1.00]           | 0.050           |
| Age                                                          | 1.51 [1.24 – 1.84]         | <0.001          | 1.54 [1.26 – 1.91]           | <0.001          |
| Time since transplantation [log <sub>10</sub> ]              | 0.74 [0.60 – 0.91]         | 0.004           | 0.82 [0.64 – 1.04]           | 0.11            |
| eGFR cystatin                                                | 0.72 [0.59 – 0.87]         | 0.001           | 0.83 [0.68 – 1.03]           | 0.09            |
| Calcineurin inhibitor usage                                  |                            |                 |                              |                 |
| - None                                                       | Reference                  |                 | Reference                    |                 |
| - Cyclosporin usage                                          | 3.43 [2.12 – 5.73]         | <0.001          | 2.83 [1.67 – 4.94]           | <0.001          |
| - Tacrolimus usage                                           | 1.95 [1.13 – 3.52]         | 0.02            | 1.70 [0.91 – 3.28]           | 0.11            |
| Smoking variables                                            |                            |                 |                              |                 |
| Smoking questionnaire                                        |                            |                 |                              |                 |
| - Never smoked                                               | Reference                  |                 | Reference                    |                 |
| - Former smoker                                              | 0.93 [0.59 – 1.46]         | 0.76            | 0.68 [0.41 – 1.13]           | 0.14            |
| - Current smoker                                             | 0.67 [0.36 – 1.26]         | 0.20            | 0.52 [0.27 – 1.00]           | 0.050           |
| Smoking behaviour correct for urinary cotinine above 50 ng/L |                            |                 |                              |                 |
| - Never smoked and low urinary cotinine                      | Reference                  |                 | Reference                    |                 |
| - Former smoker and low urinary cotinine                     | 1.00 [0.63 – 1.61]         | 0.98            | 0.72 [0.43 – 1.22]           | 0.22            |
| - Current smoker or high urinary cotinine                    | 0.72 [0.42 – 1.27]         | 0.25            | 0.56 [0.31 – 1.02]           | 0.06            |
| Smoking behaviour correct for urinary cotinine above 0 ng/L  |                            |                 |                              |                 |
| - Never smoked and no urinary cotinine                       | Reference                  |                 | Reference                    |                 |
| - Former smoker and no urinary cotinine                      | 1.02 [0.63 – 1.64]         | 0.94            | 0.72 [0.42 – 1.22]           | 0.23            |
| - Current smoker or measurable urinary cotinine              | 0.76 [0.44 – 1.31]         | 0.31            | 0.60 [0.34 – 1.09]           | 0.09            |
| Cotinine concentration in urine above 50 ng/L                | 0.68 [0.41 – 1.18]         | 0.16            | 0.66 [0.38 – 1.17]           | 0.15            |
| Cotinine concentration in urine above 0 ng/L                 | 0.67 [0.41 – 1.12]         | 0.12            | 0.64 [0.38 – 1.11]           | 0.10            |
| Alcohol variables                                            |                            |                 |                              |                 |
| Average daily alcohol intake above 20 grams/day              | 1.06 [0.58 – 2.09]         | 0.85            | 1.02 [0.53 – 2.10]           | 0.95            |
| Ethyl glucuronide concentration in urine above 10.000 ug/L   | 0.78 [0.45 – 1.40]         | 0.38            | 0.83 [0.46 – 1.53]           | 0.53            |

Abbreviations: eGFR = estimated glomerular filtration rate as calculated using the creatinine and cystatin C-based CKD-EPI formula. Multivariable: adjusted for age, sex, eGFR by cystatin C-based CKD-EPI formula, time since transplantation (log<sub>10</sub> transformed) and calcineurin inhibitor use. Missing data: smoking behaviour was missing in 39 patients; alcohol intake was missing in 61 patients, ethyl glucuronide in the urine was missing for 21 patients. All other variables had missing data for 0-3 patients.

Table S2 Univariable and multivariable logistic regression analyses results, showing the odds-ratios for having a TTV load  $\geq 4 \log_{10}$  copies/mL.

| Variable                                                              | Univariable        |         | Multivariable      |         |
|-----------------------------------------------------------------------|--------------------|---------|--------------------|---------|
|                                                                       | OR [95% CI]        | p-Value | OR [95% CI]        | p-Value |
| Female sex                                                            | 0.89 [0.61 – 1.28] | 0.52    | 0.85 [0.57 – 1.26] | 0.42    |
| Age                                                                   | 1.30 [1.08 – 1.58] | 0.007   | 1.40 [1.13 – 1.74] | 0.002   |
| Time since transplantation [ $\log_{10}$ ]                            | 0.52 [0.43 – 0.63] | <0.001  | 0.57 [0.46 – 0.71] | <0.001  |
| eGFR cystatin                                                         | 0.63 [0.51 – 0.77] | <0.001  | 0.70 [0.55 – 0.87] | 0.002   |
| Calcineurin inhibitor usage                                           |                    |         |                    |         |
| - None                                                                | Reference          |         | Reference          |         |
| - Cyclosporin usage                                                   | 2.85 [1.84 – 4.49] | <0.001  | 1.61 [0.97 – 2.68] | 0.06    |
| - Tacrolimus usage                                                    | 3.86 [2.31 – 6.52] | <0.001  | 2.38 [1.31 – 4.30] | 0.004   |
| Smoking variables                                                     |                    |         |                    |         |
| Smoking questionnaire                                                 |                    |         |                    |         |
| - Never smoked                                                        | Reference          |         | Reference          |         |
| - Former smoker                                                       | 0.85 [0.58 – 1.27] | 0.43    | 0.67 [0.43 – 1.05] | 0.08    |
| - Current smoker                                                      | 0.46 [0.22 – 0.89] | 0.03    | 0.43 [0.20 – 0.87] | 0.02    |
| Smoking behaviour correct for urinary cotinine above 50 ng/L          |                    |         |                    |         |
| - Never smoked and low urinary cotinine                               | Reference          |         | Reference          |         |
| - Former smoker and low urinary cotinine                              | 0.89 [0.59 – 1.34] | 0.58    | 0.68 [0.42 – 1.07] | 0.10    |
| - Current smoker or high urinary cotinine                             | 0.60 [0.33 – 1.05] | 0.08    | 0.54 [0.29 – 0.98] | 0.049   |
| Smoking behaviour correct for urinary cotinine above 0 ng/L           |                    |         |                    |         |
| - Never smoked and no urinary cotinine                                | Reference          |         | Reference          |         |
| - Former smoker and no urinary cotinine                               | 0.92 [0.60 – 1.39] | 0.68    | 0.69 [0.43 – 1.11] | 0.13    |
| - Current smoker or measurable urinary cotinine                       | 0.60 [0.34 – 1.03] | 0.07    | 0.55 [0.30 – 0.98] | 0.048   |
| Active smoking and urinary cotinine above 50 ng/L                     | 0.43 [0.19 – 0.88] | 0.03    | 0.44 [0.19 – 0.93] | 0.045   |
| Active smoking and urinary cotinine above 0 ng/L                      | 0.45 [0.20 – 0.88] | 0.03    | 0.46 [0.20 – 0.94] | 0.04    |
| Cotinine concentration in urine above 50 ng/L                         | 0.56 [0.30 – 1.00] | 0.06    | 0.58 [0.29 – 1.06] | 0.09    |
| Cotinine concentration in urine above 0 ng/L                          | 0.58 [0.32 – 0.98] | 0.05    | 0.60 [0.32 – 1.06] | 0.09    |
| Alcohol variables                                                     |                    |         |                    |         |
| Average daily alcohol intake above 20 grams/day                       | 0.46 [0.22 – 0.89] | 0.03    | 0.50 [0.23 – 1.01] | 0.07    |
| Ethyl glucuronide concentration in urine above 10.000 $\mu\text{g/L}$ | 0.33 [0.14 – 0.36] | 0.004   | 0.39 [0.16 – 0.80] | 0.02    |

Abbreviations: eGFR = estimated glomerular filtration rate as calculated using the creatinine and cystatin C-based CKD-EPI formula. Multivariable: adjusted for age, sex, eGFR by cystatin C-based CKD-EPI formula, time since transplantation ( $\log_{10}$  transformed) and calcineurin inhibitor use. Missing data: smoking behaviour was missing in 39 patients; alcohol intake was missing in 61 patients, ethyl glucuronide in the urine was missing for 21 patients. All other variables had missing data for 0-3 patients.

Table S3 Results of univariable and multivariable linear regression analyses in KTR with a detectable TTV load wherein the patients with the top 2.5% TTV load are excluded (n=535), with TTV load as dependent variable.

| Variable                                                     | Univariable<br>St. $\beta$ [95% CI] | <i>p</i> -<br>Value | Multivariable<br>St. $\beta$ [95% CI] | <i>p</i> -Value |
|--------------------------------------------------------------|-------------------------------------|---------------------|---------------------------------------|-----------------|
| Female sex                                                   | -0.07 [-0.25 - 0.10]                | 0.40                | -0.11 [-0.28 - 0.05]                  | 0.18            |
| Age                                                          | 0.09 [0.01 - 0.18]                  | 0.03                | 0.11 [0.02 - 0.19]                    | 0.01            |
| Time since transplantation [ $\log_{10}$ ]                   | -0.21 [-0.29 - -0.12]               | <0.001              | -0.16 [-0.25 - -0.07]                 | <0.001          |
| eGFR cystatin                                                | -0.20 [-0.29 - -0.12]               | <0.001              | -0.16 [-0.24 - -0.07]                 | <0.001          |
| Calcineurin inhibitor usage                                  |                                     |                     |                                       |                 |
| - None                                                       | Reference                           |                     | Reference                             |                 |
| - Cyclosporin                                                | 0.46 [0.27 - 0.64]                  | <0.001              | 0.28 [0.08 - 0.47]                    | 0.006           |
| - Tacrolimus                                                 | 0.44 [0.20 - 0.68]                  | <0.001              | 0.26 [0.00 - 0.52]                    | 0.051           |
| Smoking variables                                            |                                     |                     |                                       |                 |
| Smoking questionnaire                                        |                                     |                     |                                       |                 |
| - Never smoked                                               | Reference                           |                     | Reference                             |                 |
| - Former smoker                                              | -0.05 [-0.27 - 0.10]                | 0.36                | -0.14 [-0.33 - 0.04]                  | 0.13            |
| - Current smoker                                             | -0.34 [-0.62 - -0.06]               | 0.02                | -0.37 [-0.64 - -0.10]                 | 0.008           |
| Smoking behaviour correct for urinary cotinine above 50 ng/L |                                     |                     |                                       |                 |
| - Never smoked and low urinary cotinine                      | Reference                           |                     | Reference                             |                 |
| - Former smoker and low urinary cotinine                     | -0.05 [-0.25 - 0.14]                | 0.61                | -0.11 [-0.30 - 0.08]                  | 0.26            |
| - Current smoker or high urinary cotinine                    | -0.19 [-0.44 - 0.05]                | 0.13                | -0.26 [-0.50 - -0.02]                 | 0.04            |
| Smoking behaviour correct for urinary cotinine above 0 ng/L  |                                     |                     |                                       |                 |
| - Never smoked and no urinary cotinine                       | Reference                           |                     | Reference                             |                 |
| - Former smoker and no urinary cotinine                      | -0.04 [-0.24 - 0.15]                | 0.66                | -0.11 [-0.30 - 0.09]                  | 0.29            |
| - Current smoker or measurable urinary cotinine              | -0.19 [-0.43 - 0.05]                | 0.13                | -0.25 [-0.49 - -0.02]                 | 0.03            |
| Cotinine concentration in urine above 50 ng/L                | -0.22 [-0.47 - 0.02]                | 0.08                | -0.27 [-0.51 - -0.03]                 | 0.03            |
| Cotinine concentration in urine above 0 ng/L                 | -0.21 [-0.44 - 0.02]                | 0.08                | -0.25 [-0.47 - -0.03]                 | 0.03            |
| Alcohol variables                                            |                                     |                     |                                       |                 |
| Average daily alcohol intake above 20 grams/day              | -0.35 [-0.61 - -0.09]               | 0.009               | -0.33 [-0.58 - -0.08]                 | 0.01            |
| Ethyl glucuronide concentration in urine above 10.000 ug/L   | -0.41 [-0.66 - -0.15]               | 0.002               | -0.34 [-0.58 - -0.09]                 | 0.008           |

Abbreviations: eGFR = estimated glomerular filtration rate as calculated using the creatinine and cystatin C-based CKD-EPI formula. Multivariable: adjusted for age, sex, eGFR by cystatin C-based CKD-EPI formula, time since transplantation ( $\log_{10}$  transformed) and calcineurin inhibitor use. Missing data: smoking behaviour was missing in 30 patients; alcohol intake was missing in 47 patients, ethyl glucuronide in the urine was missing for 20 patients. All other variables had missing data for 0-3 patients.
